# Supplementary material
Source: publisher site journal article supplement (http://e-cmh.org/upload/media/cmh-2021-0355-suppl5.pdf)
Supplement: Supplementary file 1 [file cmh-2021-0355-suppl5.pdf]

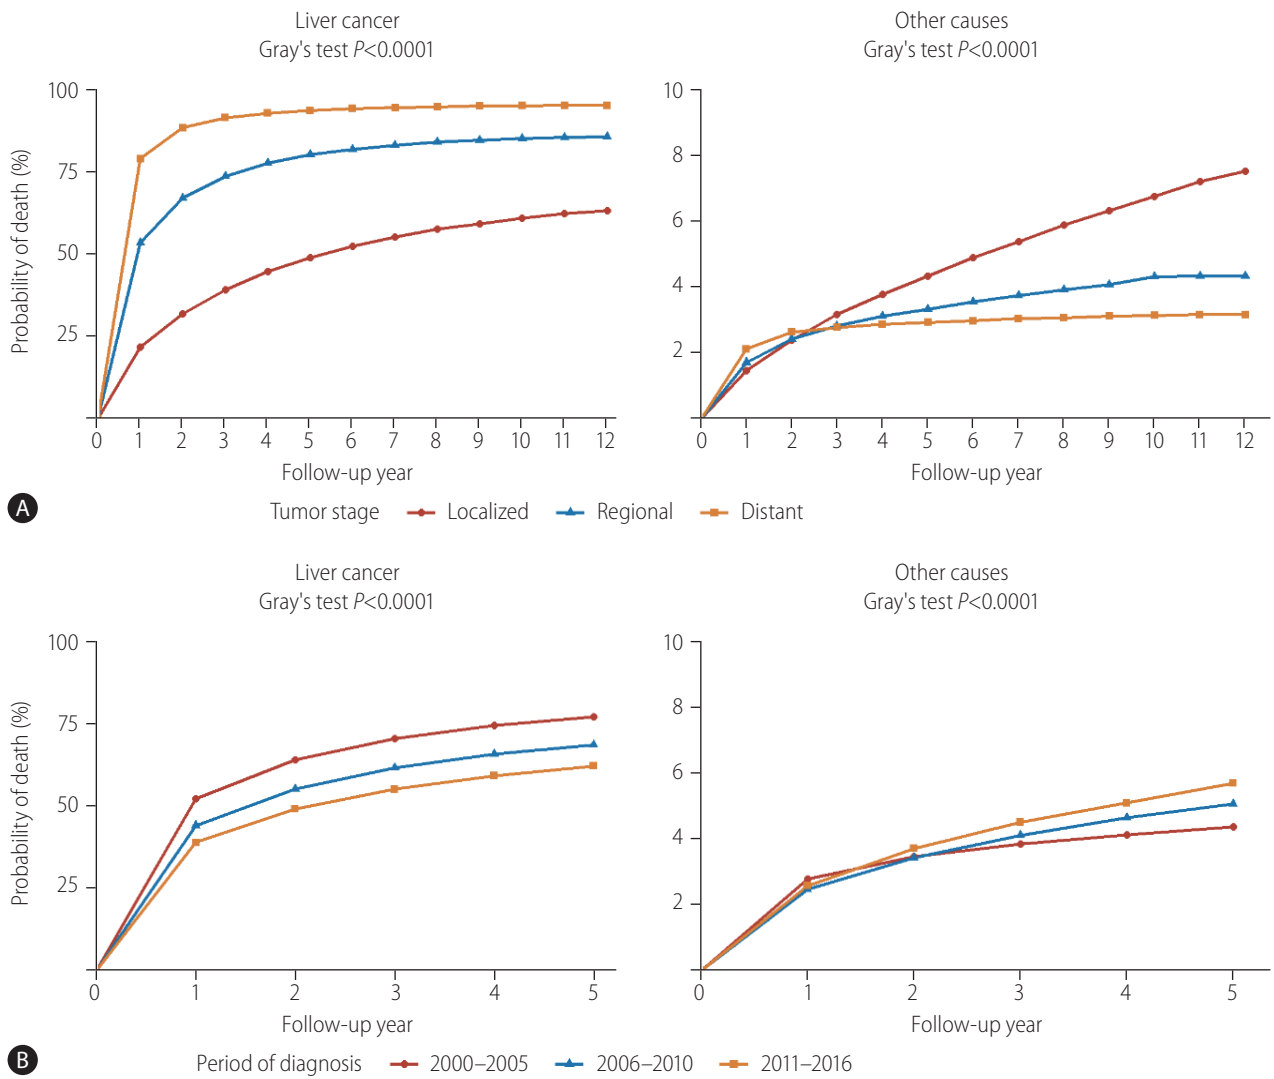

**Supplementary Figure 5.** Competing risks probabilities of death from liver cancer and other causes by tumor stage and period of diagnosis. (A) By tumor stage, 2006–2016. (B) By period of diagnosis, 2000–2016. Tumor stage information was available from 2006. The probability of death was estimated by the cumulative incidence function.
